# Supplementary material for: Sequential fate-switches in stem-like cells drive the tumorigenic trajectory from human neural stem cells to malignant glioma
Source: PubMed Central journal article supplement (PMC8169837; doi:10.1038/s41422-020-00451-z), 2021-01-04
Supplement: 41422_2020_451_MOESM2_ESM.pdf [file 41422_2020_451_MOESM2_ESM.pdf]

## Supplementary information, Fig. S2

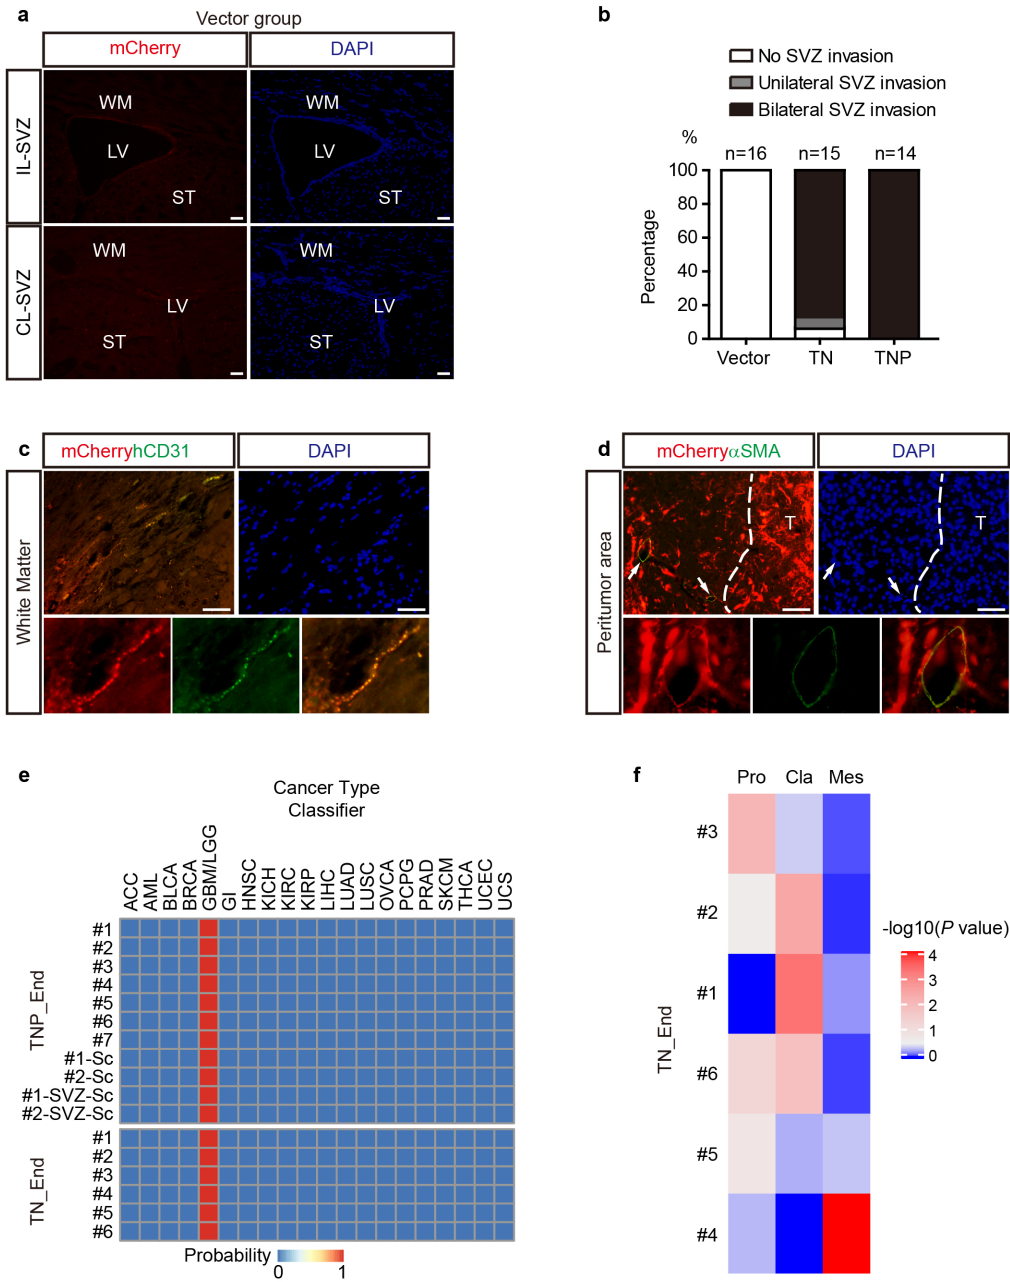

**Supplementary information, Fig. S2. TN and TNP tumors exhibit typical features of human GBM.**

(a) IF for mCherry in the SVZ ipsilateral (IL) and contralateral (CL) to the transplantation sites in brain sections of end-stage Vector mice. WM, white matter. LV, lateral ventricle. ST, striatum.

(b) The percentages of Vector, TN, and TNP mice at the end stage exhibiting unilateral or bilateral SVZ invasion.

(c, d) IF for mCherry/hCD31(c) and mCherry/ $\alpha$ -SMA(d) in the tumor-infiltrated white matter or peritumor regions in the brains of TN and TNP mice. Arrows, co-labeled cells. T, tumor. Dashed lines, the boundary between the tumor core area and the peritumor striatum region.

(e) Heatmap of the cancer subtype probability for end-stage TN and TNP samples based on GEIPA2. Rows, individual samples. Columns, TCGA tumors.

(f) Heatmap of the  $P$  values ( $-\log_{10}$ ) of GBM subtypes for bulk TN samples at End stage based on ssGSEA analysis.

Scale bars: 50 $\mu$ m.
