# Supplementary material for: Sequential fate-switches in stem-like cells drive the tumorigenic trajectory from human neural stem cells to malignant glioma
Source: PubMed Central journal article supplement (PMC8169837; doi:10.1038/s41422-020-00451-z), 2021-01-04
Supplement: 41422_2020_451_MOESM4_ESM.pdf [file 41422_2020_451_MOESM4_ESM.pdf]

# Supplementary information, Fig. S4

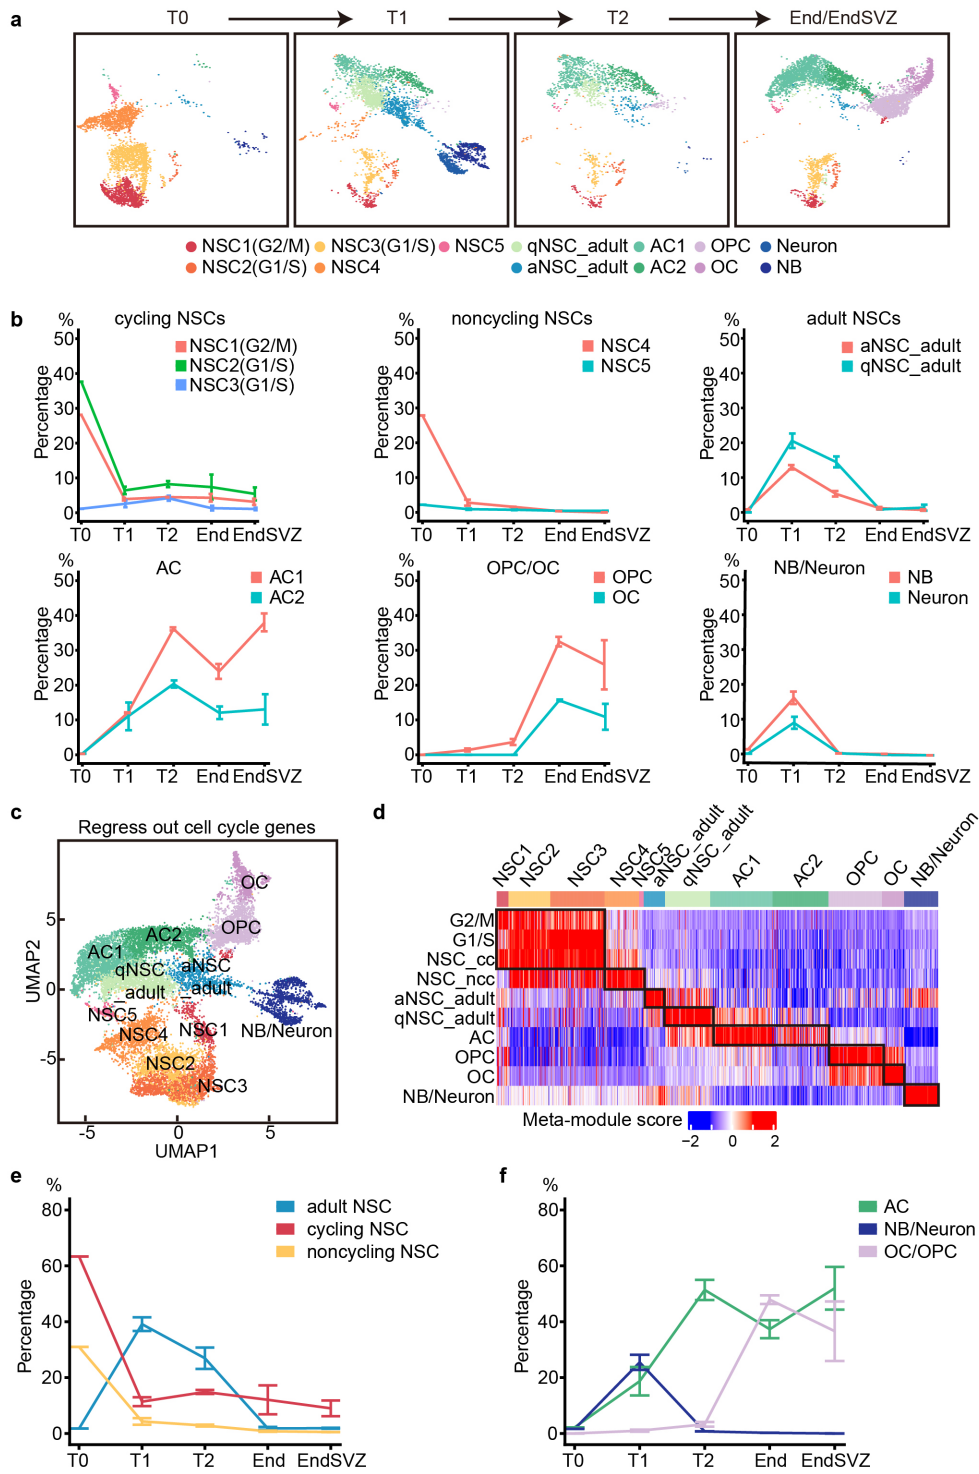

**Supplementary information, Fig. S4.** The temporal dynamics of TNP subpopulations is not significantly influenced by cell cycle variance.

(a) The chronological UMAP plots (from left to right) for TNP single cells at T0 to End/EndSVZ. Clusters are separated by colors.

(b) The cellular frequencies of every cluster in Fig. 4a at different stages. Error bars, mean  $\pm$  SEM.

(c) UMAP of human single cells from TNP samples after regressing out the cell cycle genes. Clusters are separated by colors.

(d) Heatmap of scaled meta-module scores for cells in each cluster in (c).

(e) The cellular frequencies of NSC subpopulations per sample at different stages after regressing out cell cycle genes. Error bars, mean  $\pm$  SEM.

(f) The cellular frequencies of AC, OPC/OC, and NB/Neuron subpopulations per sample at different stages after regressing out cell cycle genes. Error bars, mean  $\pm$  SEM.
