# Supplementary material for: Sequential fate-switches in stem-like cells drive the tumorigenic trajectory from human neural stem cells to malignant glioma
Source: PubMed Central journal article supplement (PMC8169837; doi:10.1038/s41422-020-00451-z), 2021-01-04
Supplement: 41422_2020_451_MOESM5_ESM.pdf [file 41422_2020_451_MOESM5_ESM.pdf]

Supplementary information, Fig. S5

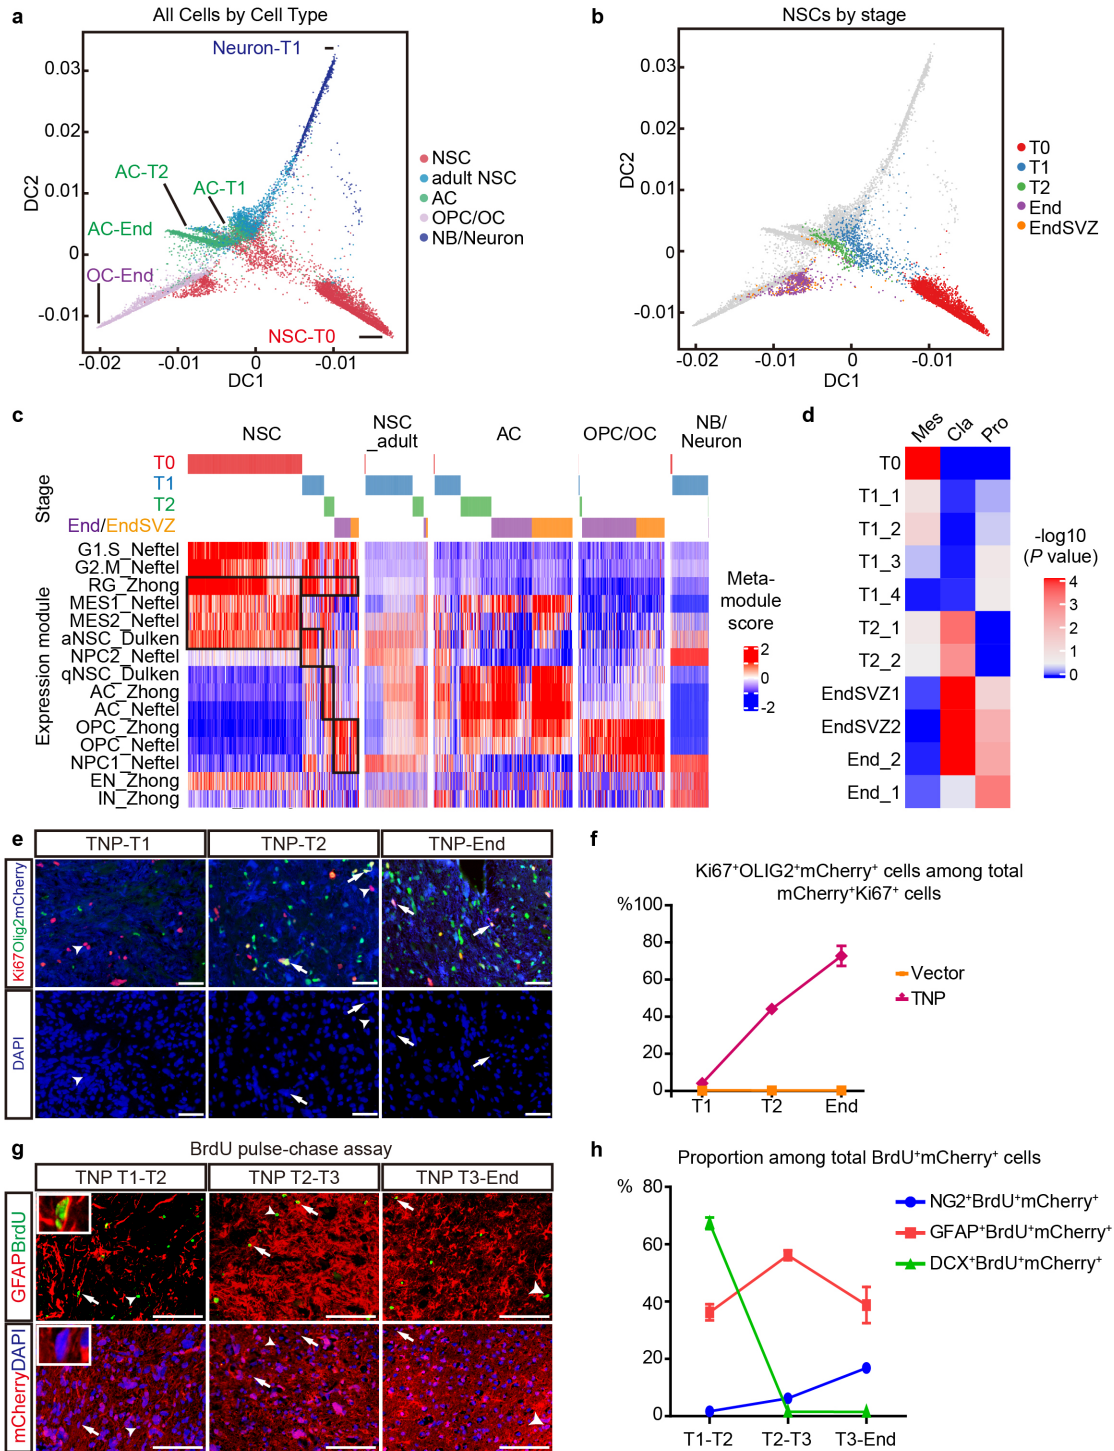

**Supplementary information, Fig. S5.** Diffusion map of TNP single cells.

(a) Diffusion map of TNP single cells. Cells are colored by cell type with tips for each branch labeled.

(b) NSCs at different stages highlighted in the diffusion map.

(c) Heatmap of scaled meta-module scores for cells in each subpopulation ordered by stage.

(d) Heatmap of the  $P$  values ( $-\log_{10}$ ) of GBM subtypes for single-cell pseudo-bulk of TNP samples at the T1, T2, and End stages based on ssGSEA analysis.

(e) Triple-labeling of Ki67/Olig2/mCherry in the central areas of TNP cells at T1, T2 and End. Arrows, triple-positive cells. Arrowheads, Ki67<sup>+</sup>Olig2<sup>+</sup>mCherry<sup>+</sup> cells. Scale bars: 50 $\mu$ m.

(f) The ratio of Ki67<sup>+</sup>Olig2<sup>+</sup>mCherry<sup>+</sup> cells among total Ki67<sup>+</sup>mCherry<sup>+</sup> cells in Vector and TNP brains at T1, T2, and End.

(g) IF co-labeling of mCherry with GFAP/BrdU in the central regions of TNP cells o pulsed at T1, T2, and T3 and analyzed at T2, T3, and End, respectively. Arrows, triple-positive cells. Arrowheads, BrdU<sup>+</sup>GFAP<sup>+</sup>mCherry<sup>+</sup> cells. Inset, a representative BrdU<sup>+</sup>GFAP<sup>+</sup>mCherry<sup>+</sup> cell. Scale bars: 100 $\mu$ m.

(h) The proportion of NG2<sup>+</sup>BrdU<sup>+</sup>mCherry<sup>+</sup>, GFAP<sup>+</sup>BrdU<sup>+</sup>mCherry<sup>+</sup>, or DCX<sup>+</sup>BrdU<sup>+</sup>mCherry<sup>+</sup> cells among total BrdU<sup>+</sup>mCherry<sup>+</sup> cells in BrdU pulse-chase assays.
