# Supplementary material for: Sequential fate-switches in stem-like cells drive the tumorigenic trajectory from human neural stem cells to malignant glioma
Source: PubMed Central journal article supplement (PMC8169837; doi:10.1038/s41422-020-00451-z), 2021-01-04
Supplement: 41422_2020_451_MOESM7_ESM.pdf [file 41422_2020_451_MOESM7_ESM.pdf]

Supplementary information, Fig. S7

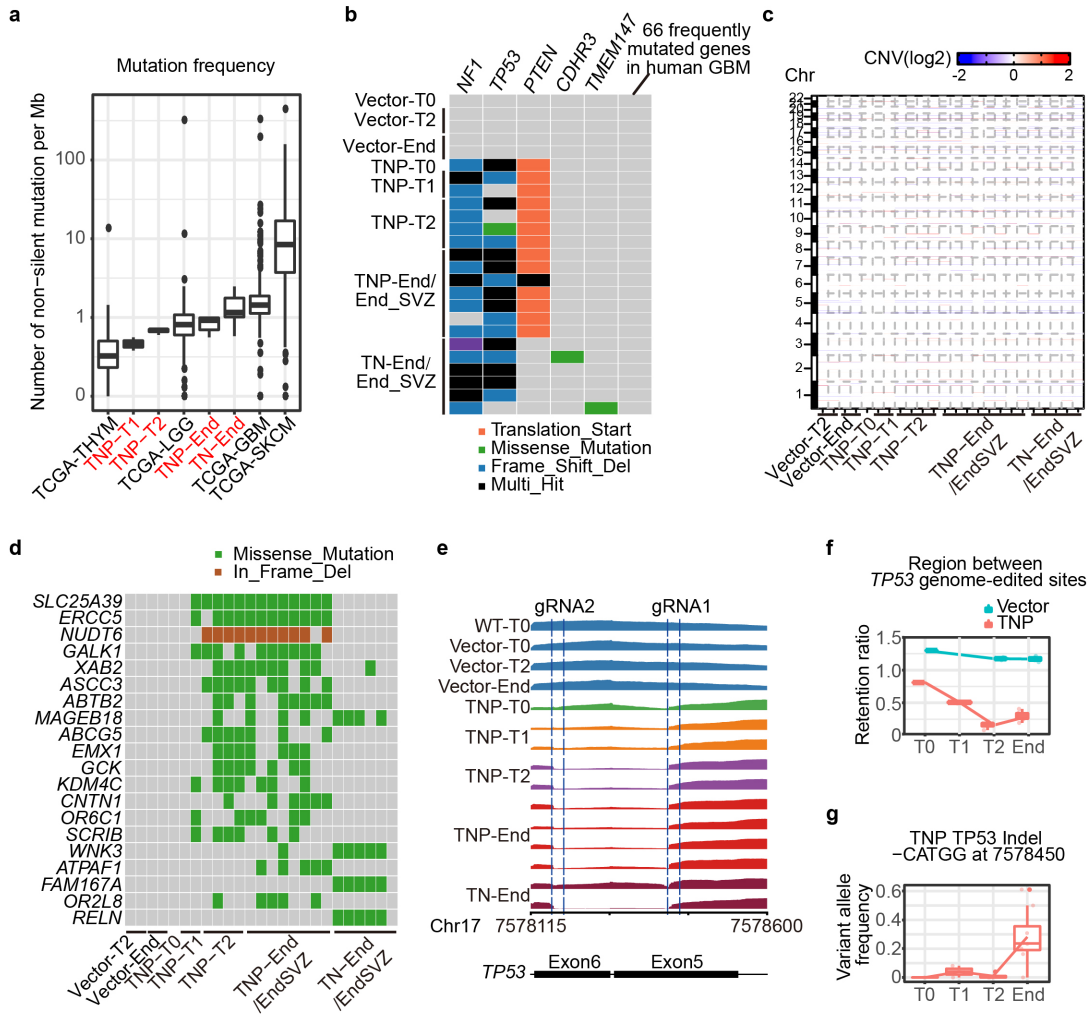

**Supplementary information, Fig. S7.** Genomic alterations of TN and TNP samples at each stage.

(a) The frequency of non-silent mutations in TN and TNP samples at T1, T2, and End compared to selected TCGA tumor types THYM, LGG, GBM, and SKCM.

(b) The mutational status of 71 frequently mutated genes in human GBM including *TP53*, *NF1*, and *PTEN* among Vector, TN, and TNP samples at different stages. Columns, samples; rows, genes.

(c) Inferred CNVs in Vector, TN, and TNP samples at different stages based on WES data. Columns, individual samples. Rows, chromosomes.

(d) The mutational status of recurrently mutated genes in Vector, TN, and TNP samples at different stages.

(e) WES read densities of genomic regions covering *TP53* exons 5 and 6 in WT, Vector, TN, and TNP samples at different stages. Dashed lines, regions targeted by *TP53* gRNAs.

(f) The retention ratio of the genomic region between two gene-edited sites in Vector and TNP samples at different stages.

(g) The variant allele frequency for a *TP53* mutant in TNP samples with a short deletion of CATGG in *TP53* exon 5.
