# Supplementary material for: Sequential fate-switches in stem-like cells drive the tumorigenic trajectory from human neural stem cells to malignant glioma
Source: PubMed Central journal article supplement (PMC8169837; doi:10.1038/s41422-020-00451-z), 2021-01-04
Supplement: 41422_2020_451_MOESM8_ESM.pdf [file 41422_2020_451_MOESM8_ESM.pdf]

# Supplementary information, Fig. S8

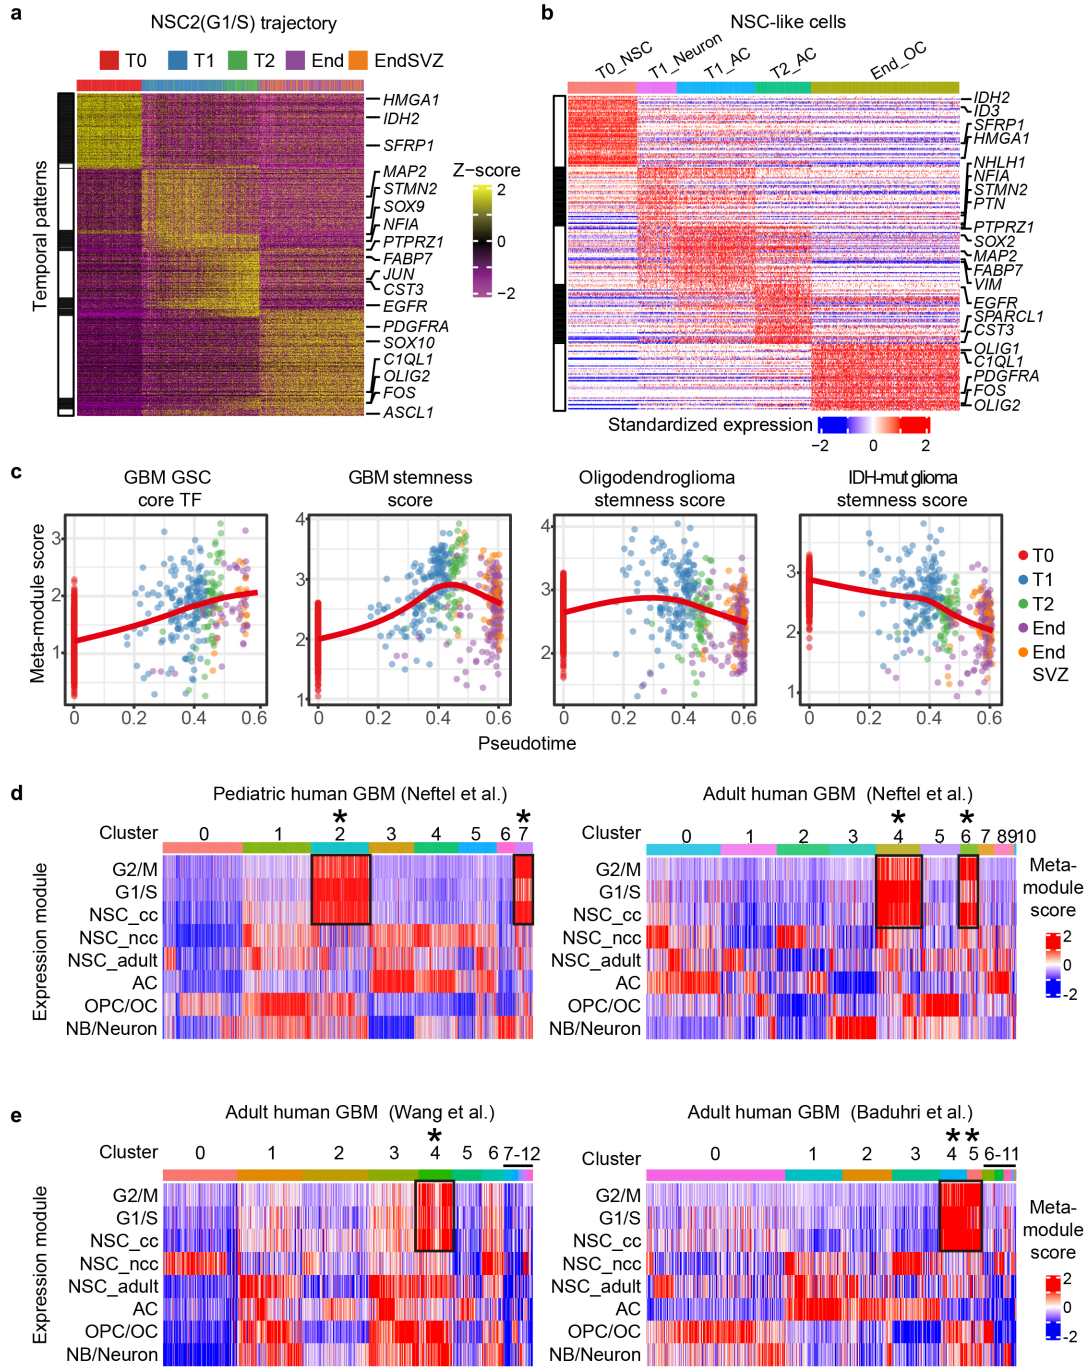

**Supplementary information, Fig. S8.** Cell-type- and stage-specific signatures of NSC-like cells and their presence in human pediatric and adult GBM samples.

**(a)** Heatmap of gene expression cascades along the pseudotime of NSC2. Columns, pseudotime-ordered cells. Rows, genes. Colors in the top row indicate the actual sample time of each cell. Genes were clustered by their temporal expression patterns (left bars).

**(b)** The heatmap of DE genes in NSC-like cells located in different branches of the gliomagenesis tree (Figure 5a, c).

**(c)** Trajectory plots of the meta-module score of published glioma stemness gene sets along the pseudotime of NSC1.

**(d, e)** Heatmap of the meta-module scores for single tumor cells of pediatric and adult GBMs from Neftel et al. **(d)**, Wang et al. and Baduhri et al. **(e)** studies. The cells clusters were defined by unsupervised clustering in UMAP. Asterisks, NSC-like subpopulations.
