# Supplementary material for: Sequential fate-switches in stem-like cells drive the tumorigenic trajectory from human neural stem cells to malignant glioma
Source: PubMed Central journal article supplement (PMC8169837; doi:10.1038/s41422-020-00451-z), 2021-01-04
Supplement: 41422_2020_451_MOESM9_ESM.pdf [file 41422_2020_451_MOESM9_ESM.pdf]

**Supplementary information, Fig. S9**

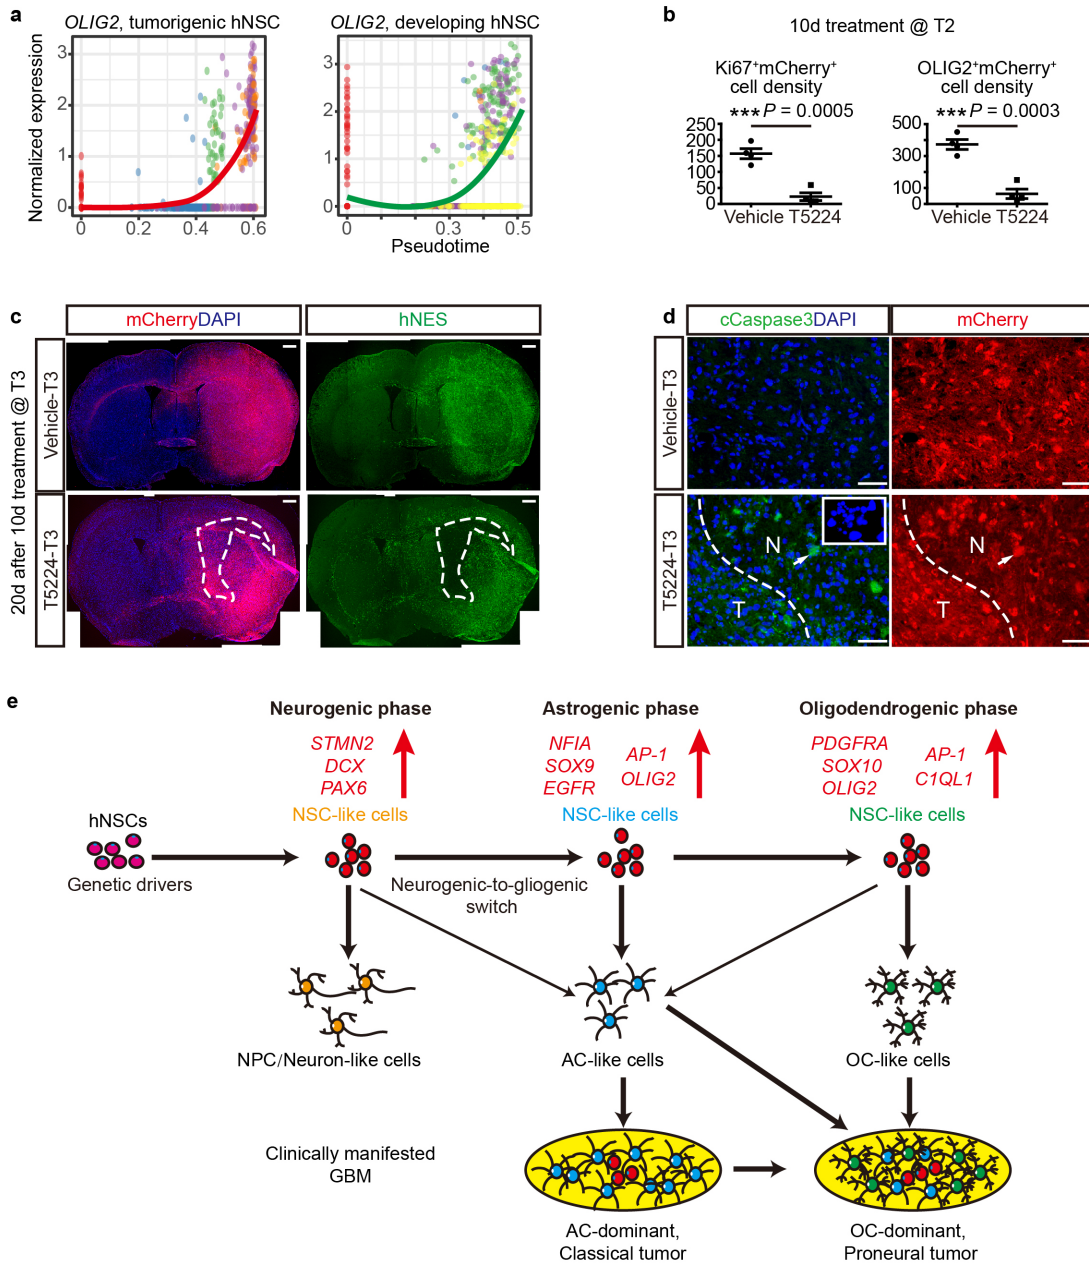

**Supplementary information, Fig. S9.** AP-1 inhibition at a later stage exhibited partial tumor inhibition.

(a) Trajectory plots of *OLIG2* in tumorigenic TNP hNSCs (top) and developing embryonic hNSCs (bottom).

(b) The number of Ki67<sup>+</sup>mCherry<sup>+</sup>, and OLIG2<sup>+</sup>mCherry<sup>+</sup> cells per high-power field in the central tumor areas of TNP mice treated with vehicle or T5224 at T2 for 10 days. n=4 for each group, *P* values from Student's t-test.

(c) Low magnification view of mCherry<sup>+</sup>DAPI<sup>+</sup> cells and hNES<sup>+</sup> cells in brain sections of TNP mice 20 days after the 10-day treatment with vehicle or T5224 at T3. Dashed lines, the overt necrotic region inside the tumor. Scale bars, 1mm.

(d) IF for cCaspas3/DAPI and mCherry in brain sections of TNP mice 20 days after the 10-day treatment with vehicle or T5224 at T3. Dashed lines, a rough boundary between the necrotic region and the remaining tumor region. Inset, apoptotic nucleus. N, necrotic region. T, tumor region. Scale bars, 50μm.

(e) A proposed model summarizing the tumorigenic trajectory from mutant hNSCs to clinically manifested GBM. Genes in red represent signature genes in NSC-like cells at each phase.
